# Supplementary material for: AKF-D52, a Synthetic Phenoxypyrimidine-Urea Derivative, Triggers Extrinsic/Intrinsic Apoptosis and Cytoprotective Autophagy in Human Non-Small Cell Lung Cancer Cells
Source: MDPI journal article supplement (doi:10.3390/cancers13225849), 2021-11-22
Supplement: s1 [file s1]

## Supplementary Figures

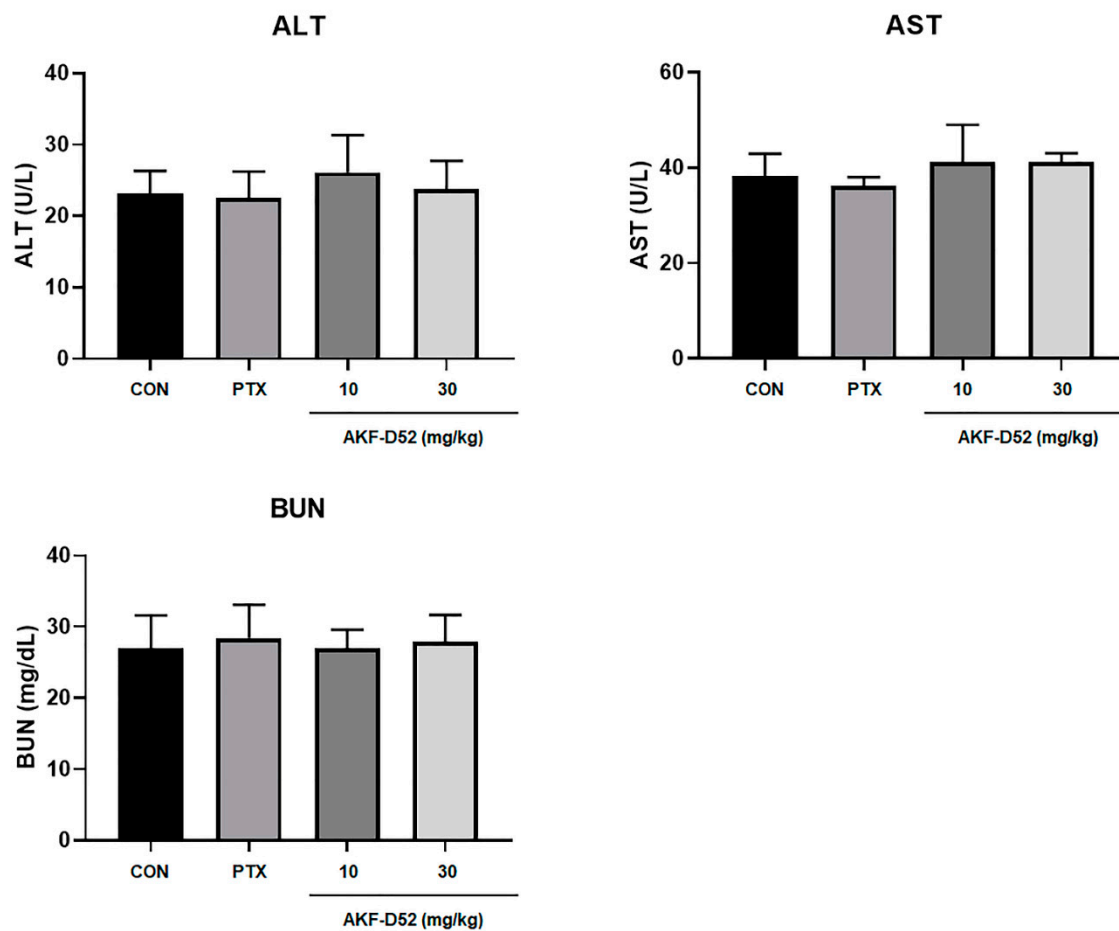

**Figure S1.** Evaluation of the toxicity of AKF-D52 and paclitaxel in an A549 xenograft model. ALT, AST, and BUN levels were examined using plasma samples from the mice of each group.

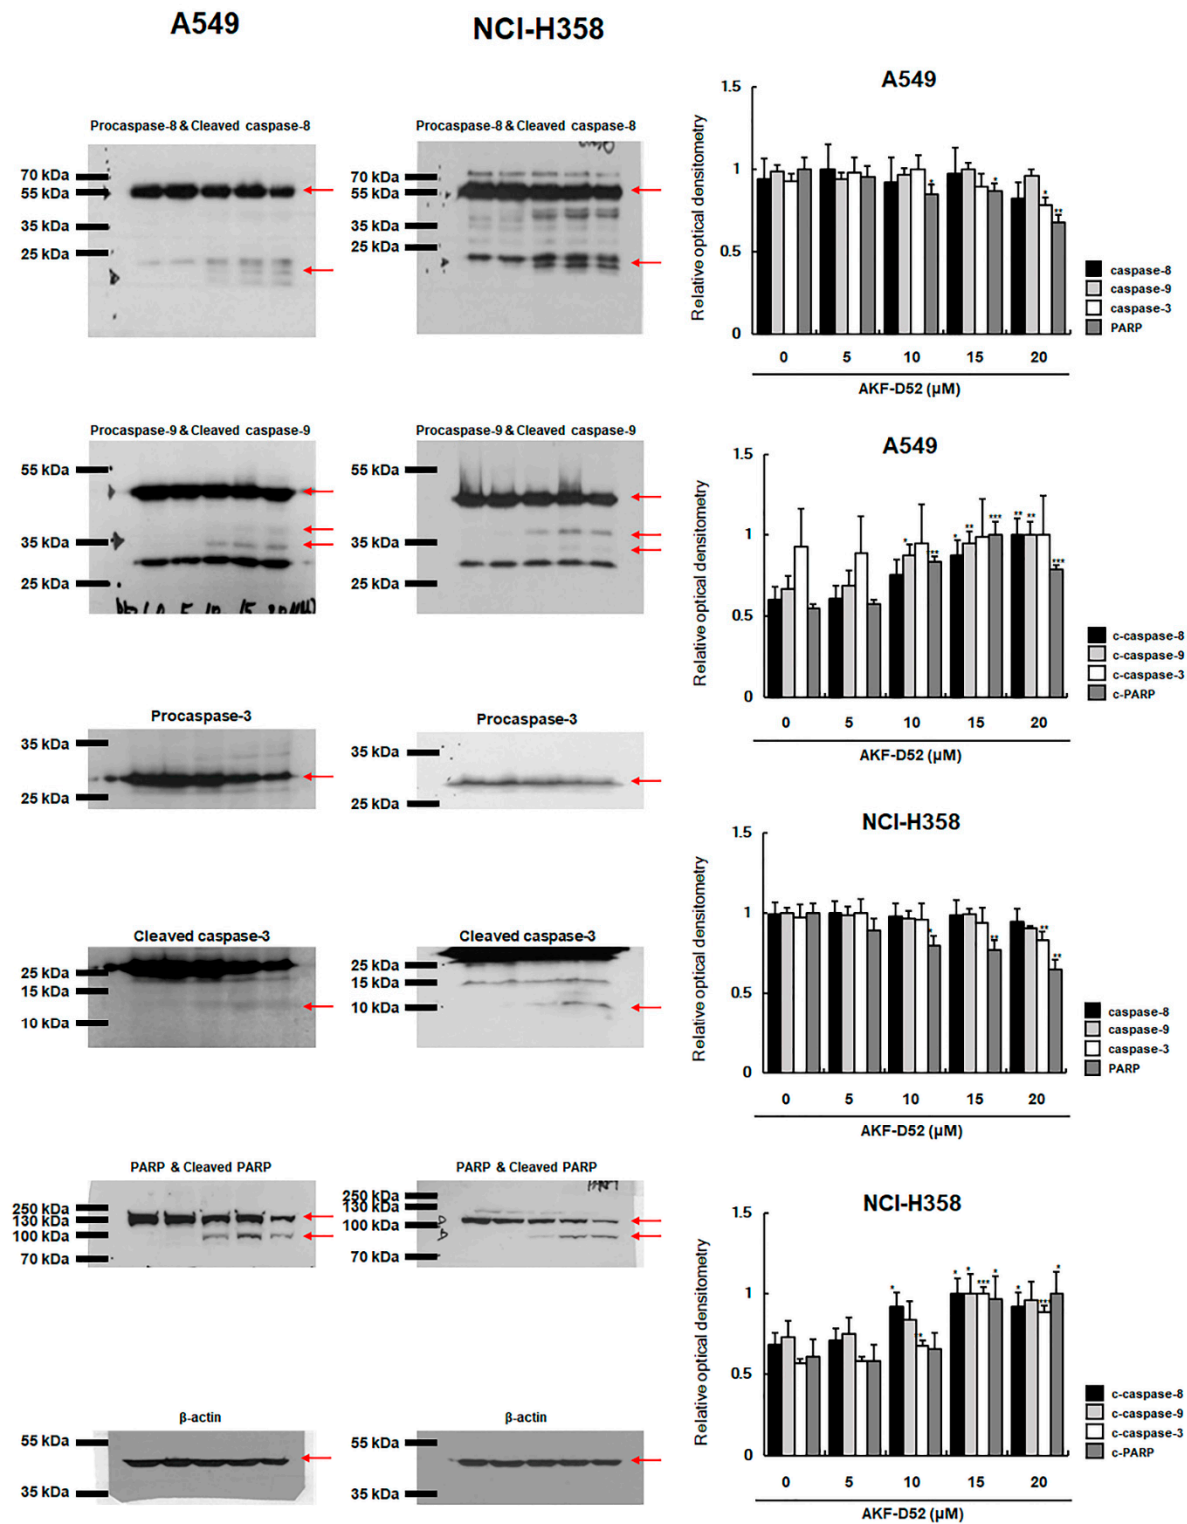

**Figure S2.** Original images and densitometer analysis of Western blot data in Figure 2A.

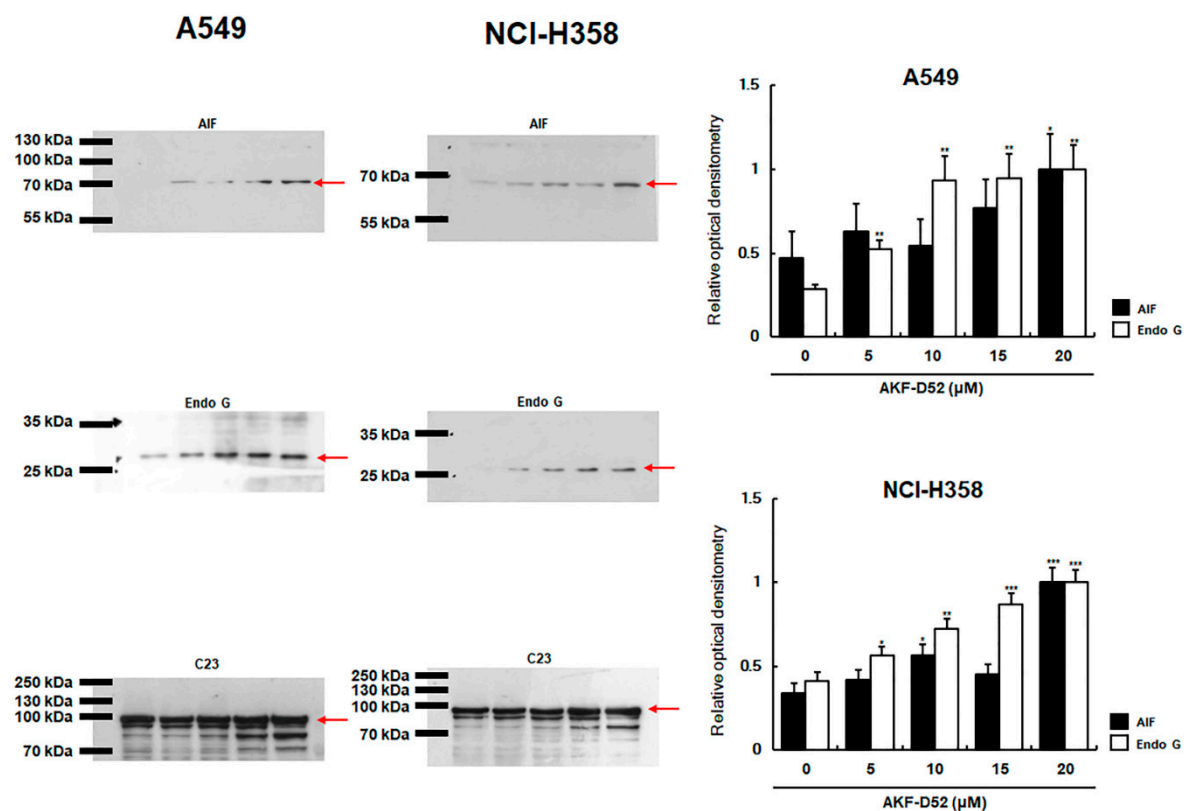

**Figure S3.** Original images and densitometer analysis of Western blot data in Figure 2C.

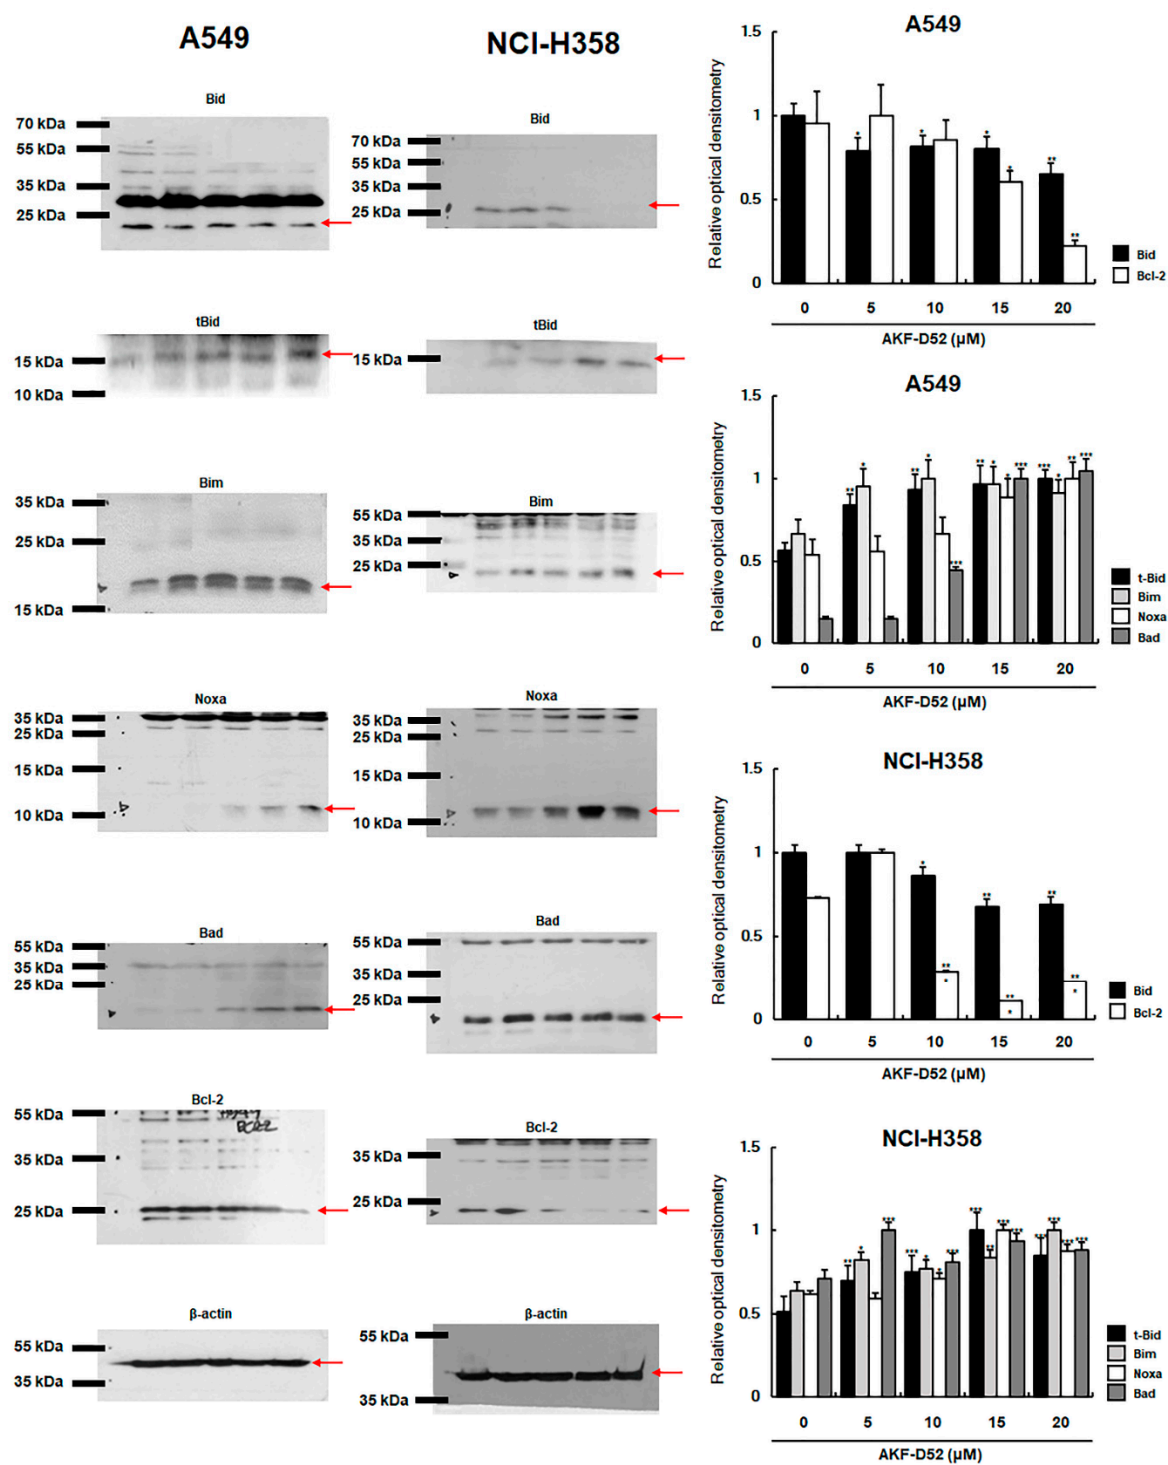

**Figure S4.** Original images and densitometer analysis of Western blot data in Figure 3A.

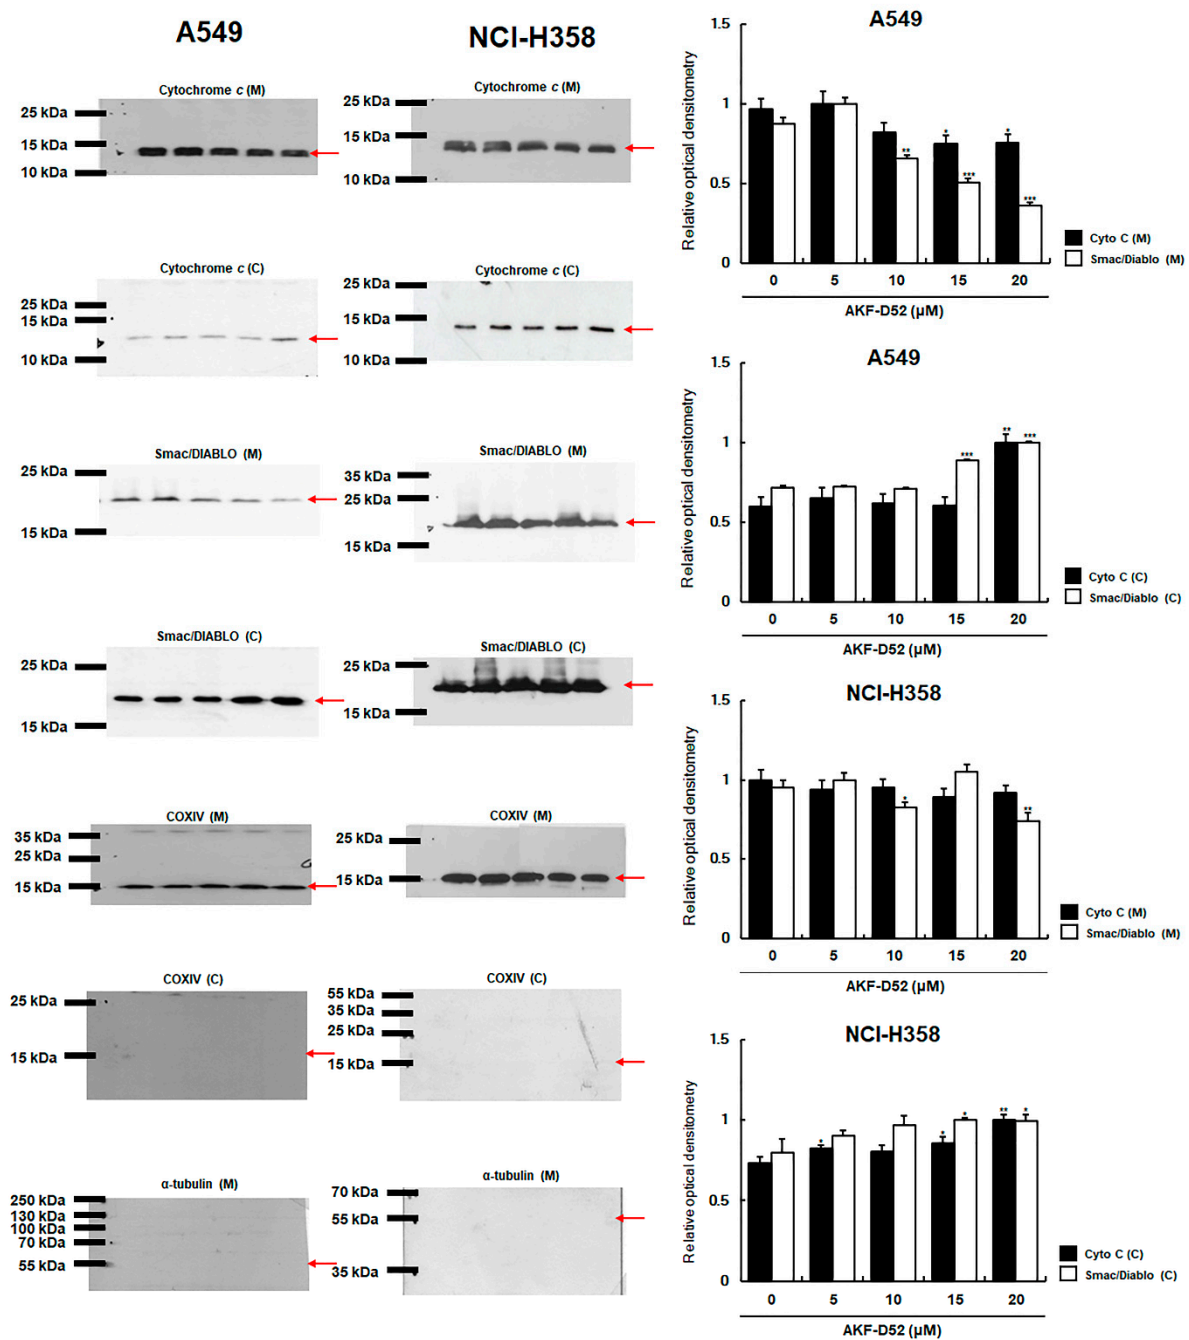

**Figure S5.** Original images and densitometer analysis of Western blot data in Figure 3C.

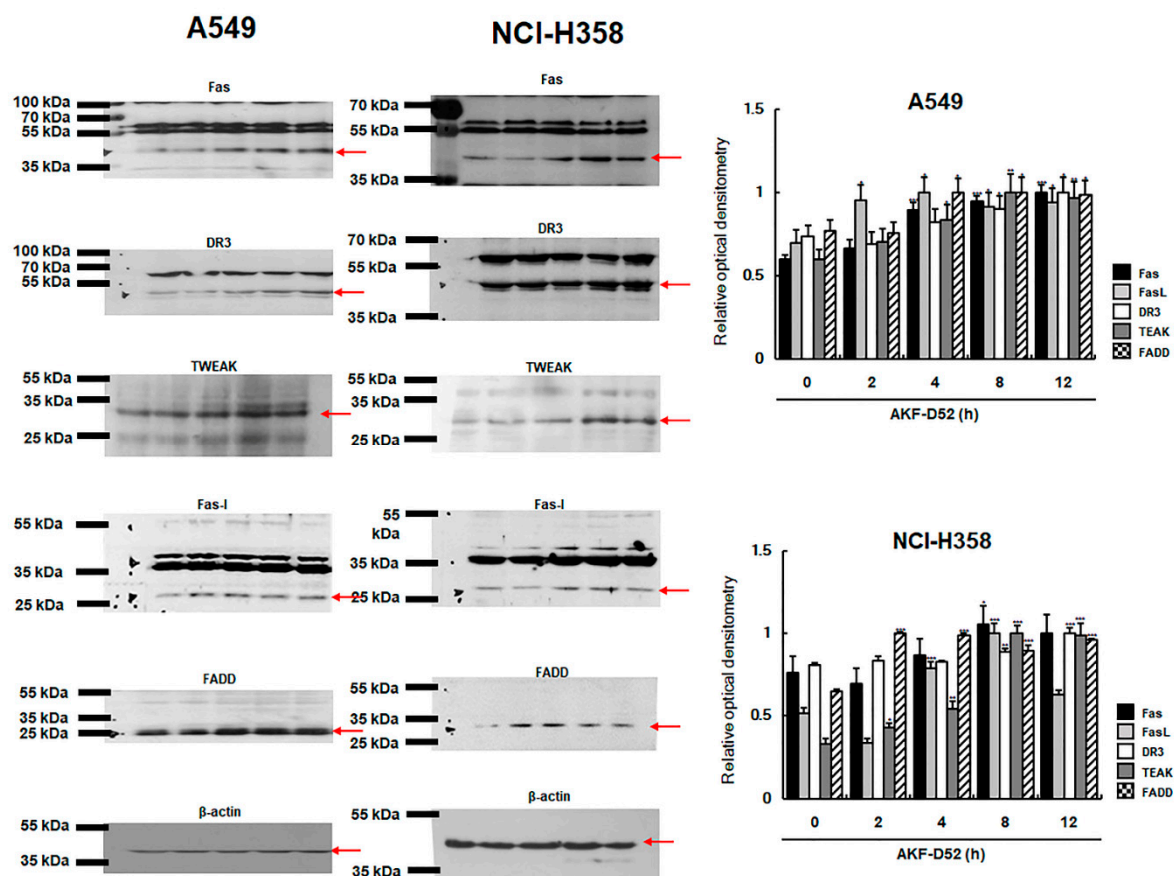

**Figure S6.** Original images and densitometer analysis of Western blot data in Figure 4A.

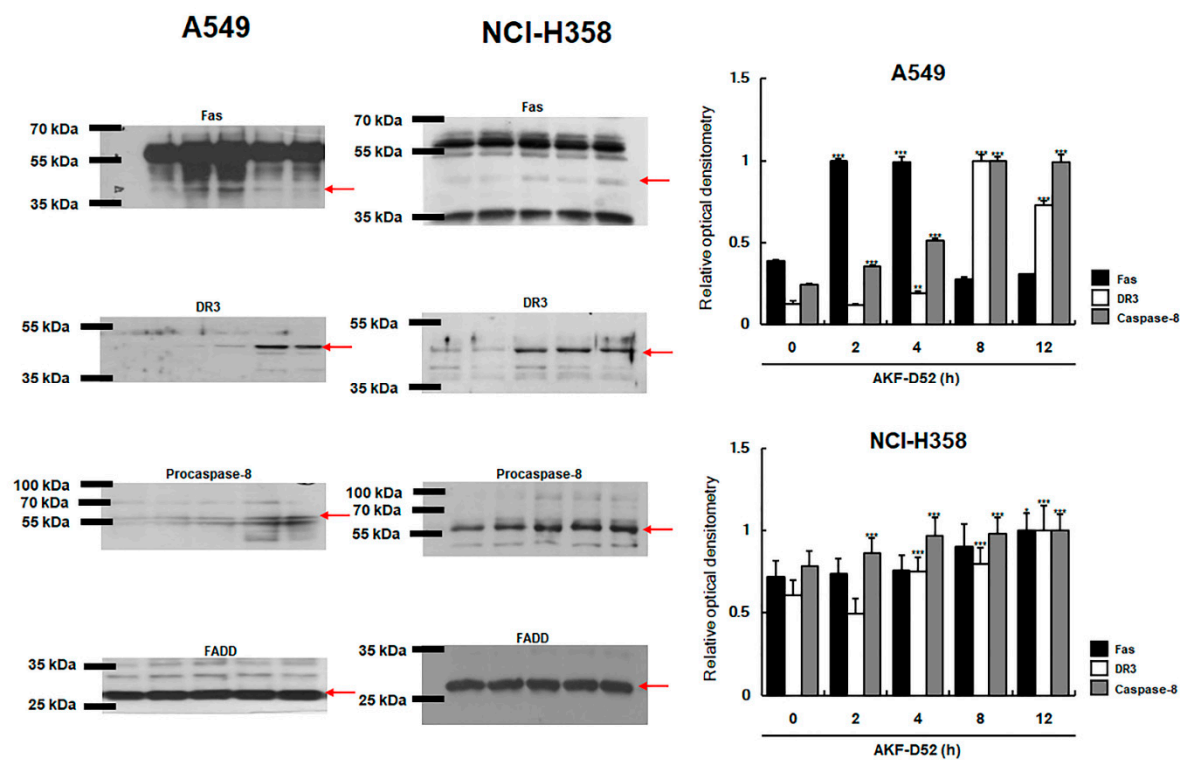

**Figure S7.** Original images and densitometer analysis of Western blot data in Figure 4B.

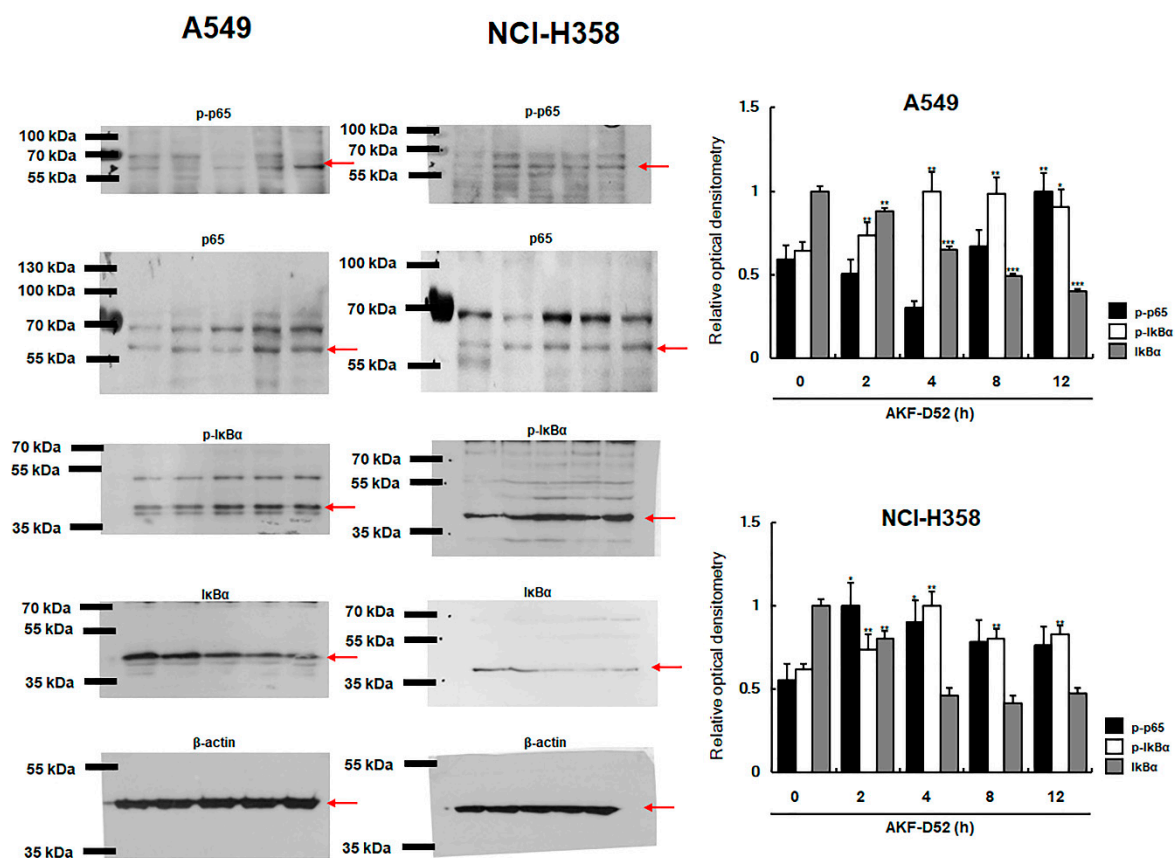

**Figure S8.** Original images and densitometer analysis of Western blot data in Figure 4C.



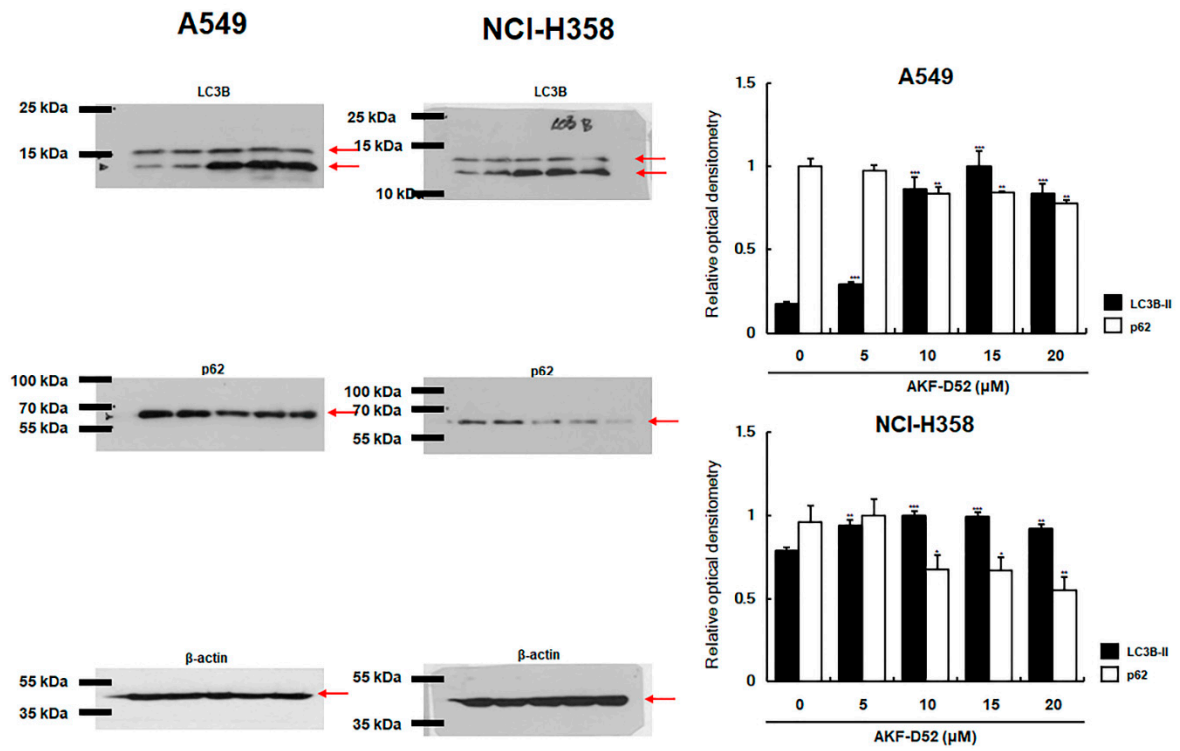

**Figure S9.** Original images and densitometer analysis of Western blot data in Figure 5B.

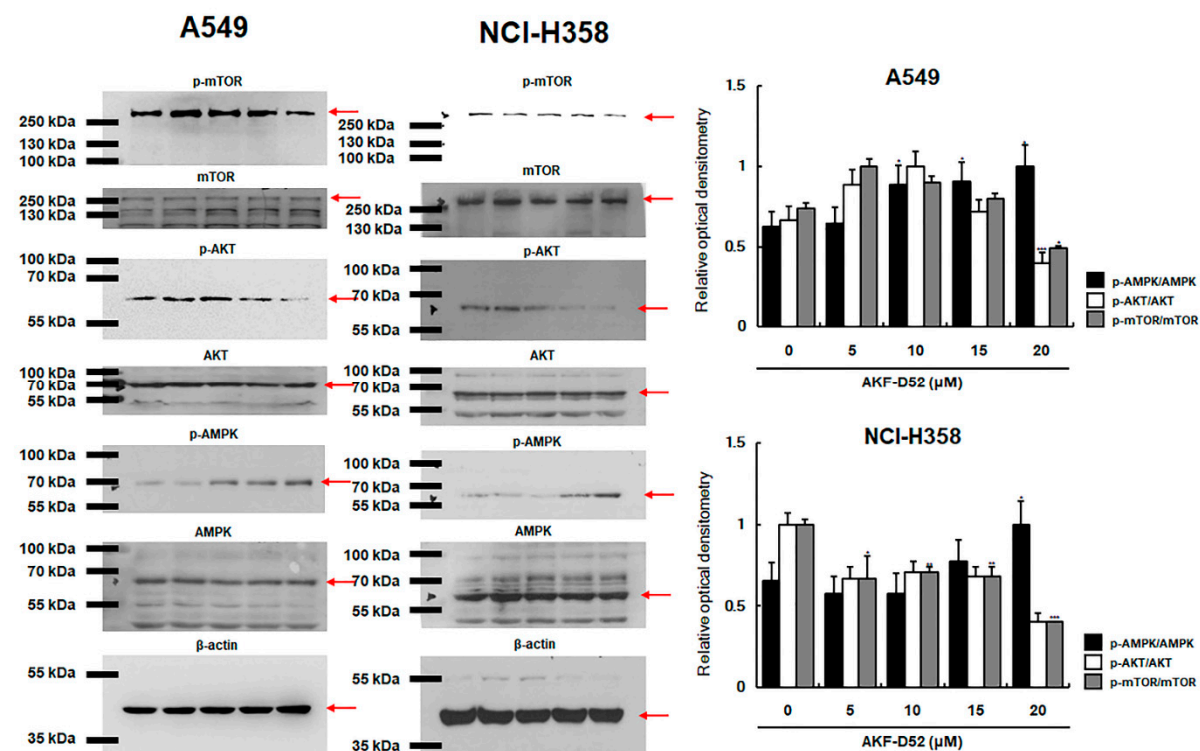

**Figure S10.** Original images and densitometer analysis of Western blot data in Figure 5C.

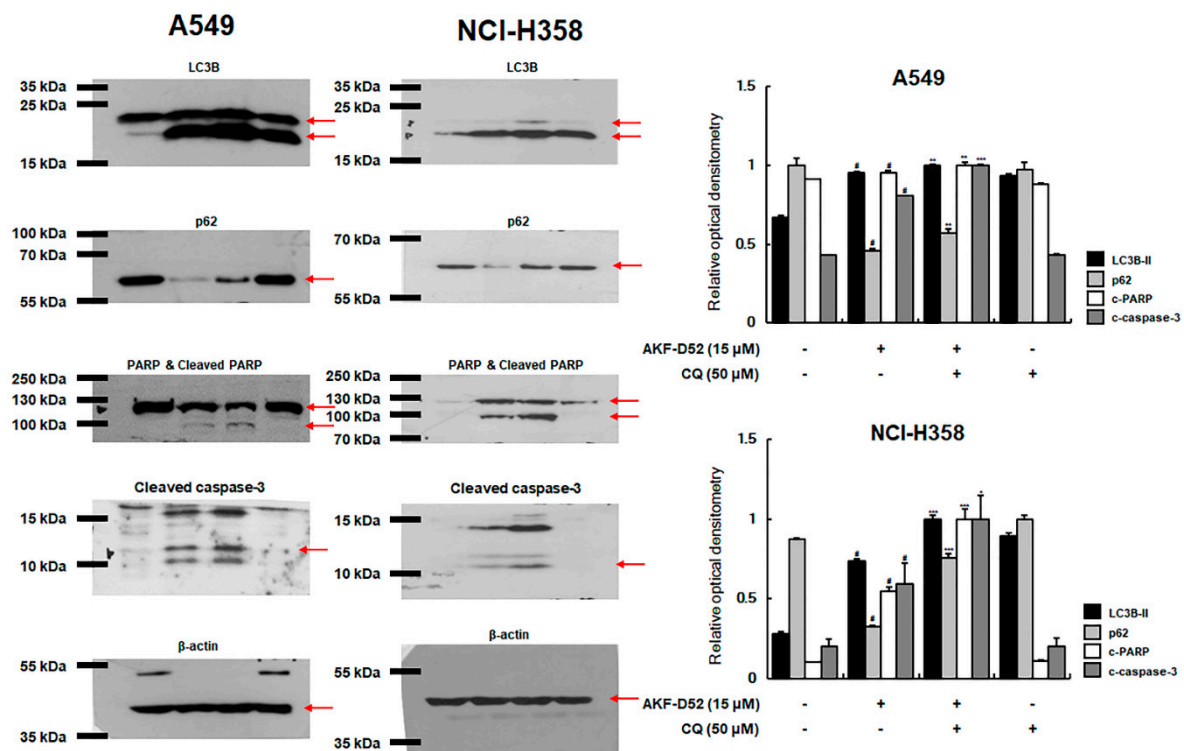

**Figure S11.** Original images and densitometer analysis of Western blot data in Figure 5E.

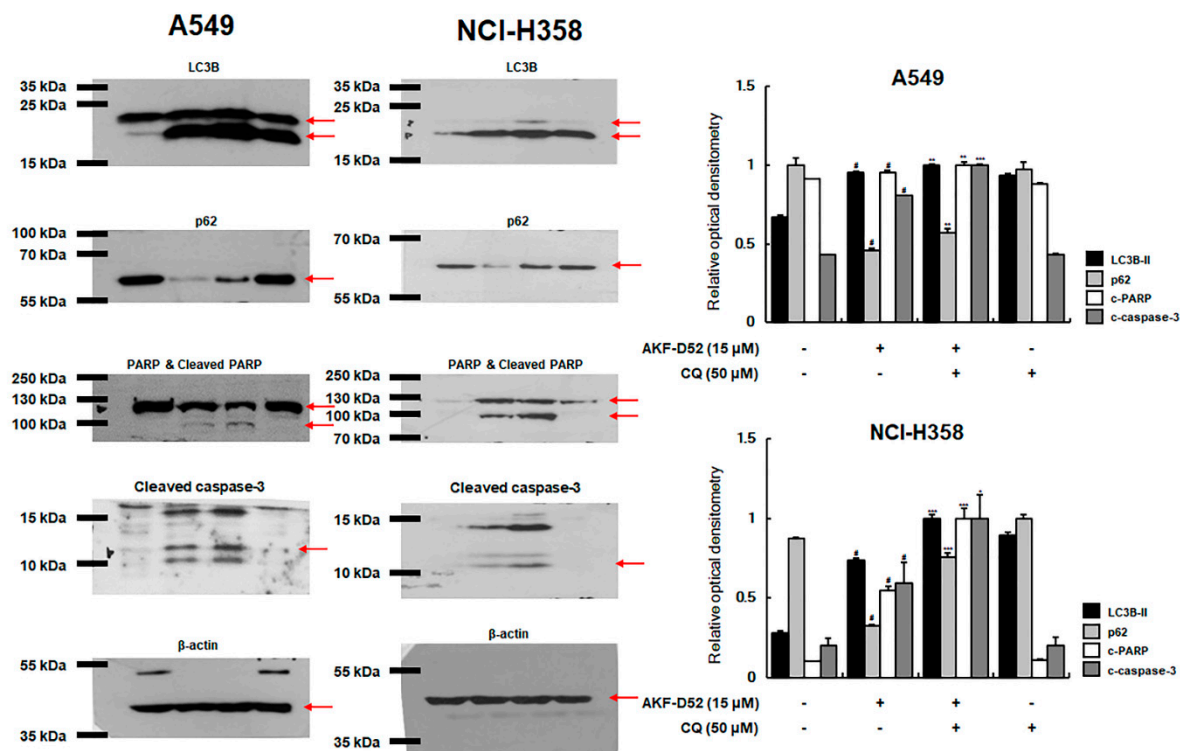

**Figure S12.** Original images and densitometer analysis of Western blot data in Figure 6D.

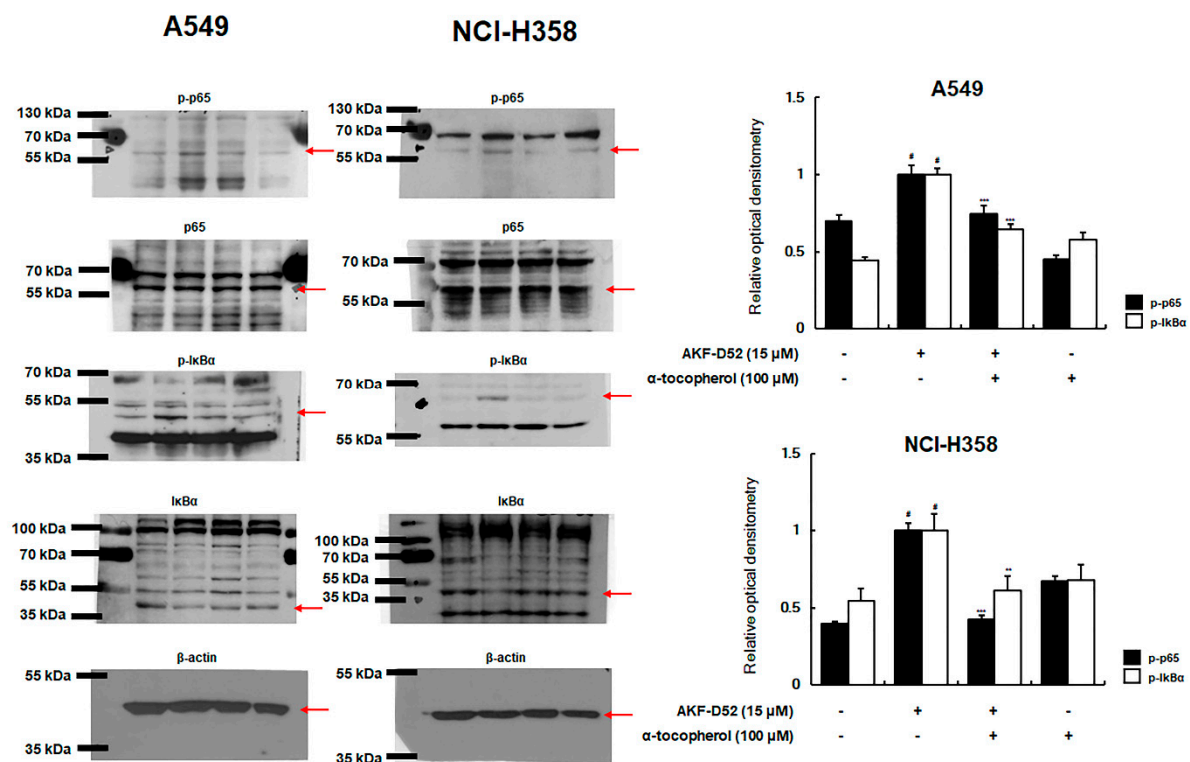

**Figure S13.** Original images and densitometer analysis of Western blot data in Figure 6E.

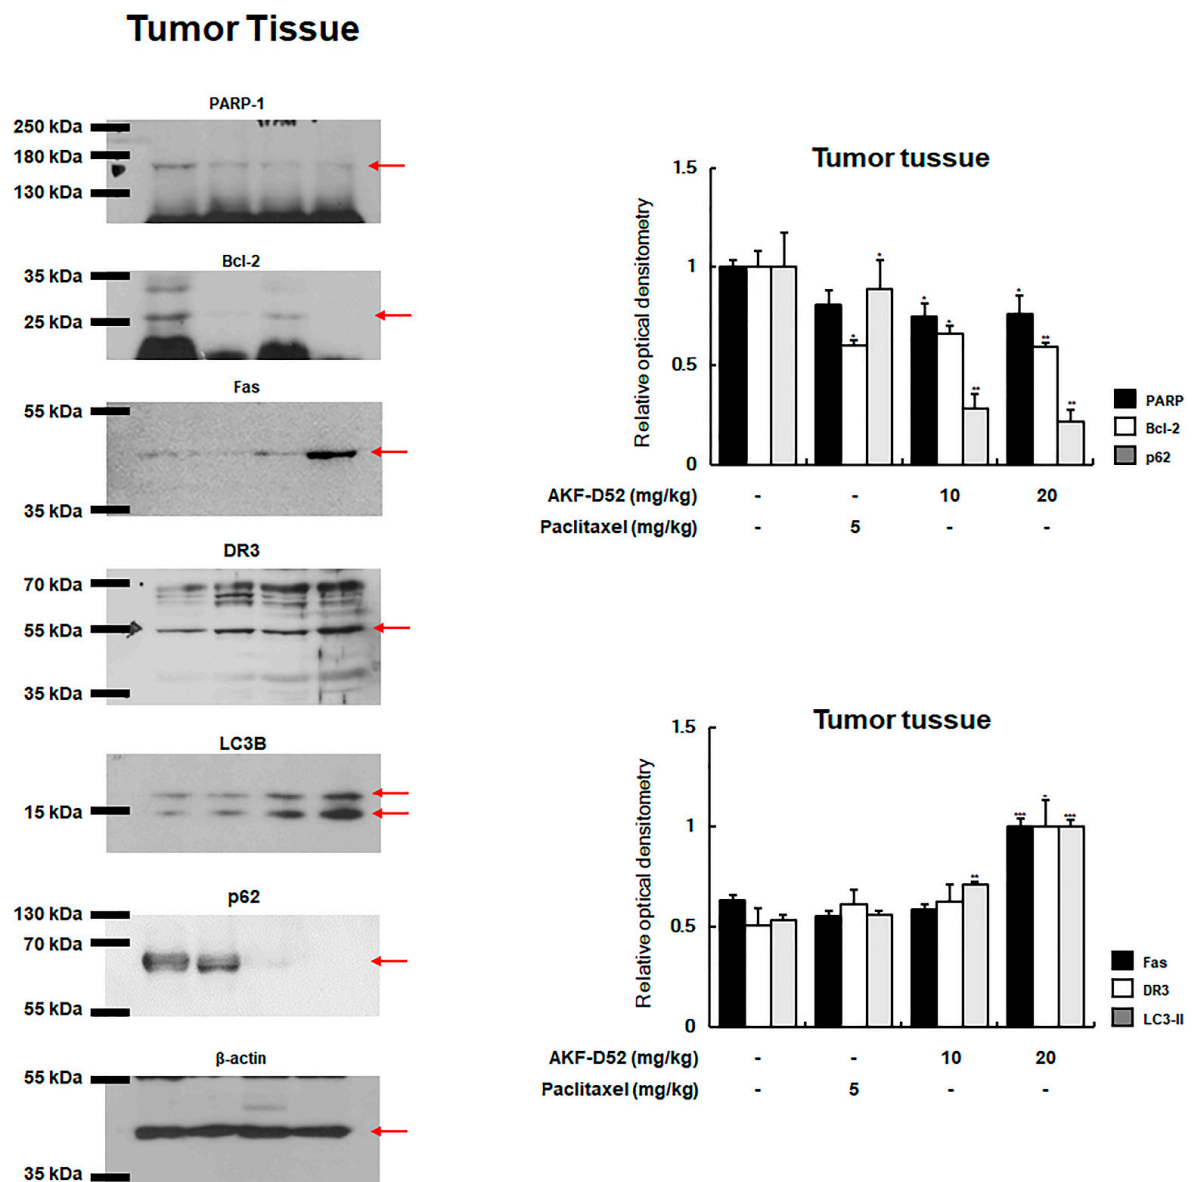

**Figure S14.** Original images and densitometer analysis of Western blot data in Figure 7G.
